## Correction for: The miR-590-3p/CFHR3/STAT3 signaling pathway promotes cell proliferation and metastasis in hepatocellular carcinoma

Zhongzhong Wan<sup>1,\*</sup>, Xingrun Li<sup>1,\*</sup>, Xinru Luo<sup>1</sup>, Bofan Wang<sup>1</sup>, Xiang Zhou<sup>1</sup>, Ao Chen<sup>1,2,3</sup>

<sup>1</sup>Institute of Biology and Medicine, College of Life Science and Health, Wuhan University of Science and Technology, Wuhan 430081, Hubei Province, People's Republic of China

<sup>2</sup>State Key Laboratory for Liver Research, The University of Hong Kong, Hong Kong 0000, People's Republic of China

<sup>3</sup>Department of Pathology, Li Ka Shing Faculty of Medicine, The University of Hong Kong, Hong Kong 0000, People's Republic of China

\*Co-first author

Correspondence to: Xiang Zhou, Ao Chen; email: [zhouxiang@wust.edu.cn](mailto:zhouxiang@wust.edu.cn), [chenao@wust.edu.cn](mailto:chenao@wust.edu.cn)

Original article: *Aging (Albany NY)* 2022; 14: pp 5783—5799

PMID: [35852862](https://pubmed.ncbi.nlm.nih.gov/35852862/)

PMCID: [PMC9365569](https://pubmed.ncbi.nlm.nih.gov/PMC9365569/)

doi: [10.18632/aging.204178](https://doi.org/10.18632/aging.204178)

**This article has been corrected:** The authors requested that affiliations 2 and 3 of the last author, Dr. Ao Chen, be removed, as his position as a Hong Kong Scholar in the Department of Pathology, University of Hong Kong was only a short-term collaboration.

The correct authors list with the affiliations is listed below.

Zhongzhong Wan<sup>1,\*</sup>, Xingrun Li<sup>1,\*</sup>, Xinru Luo<sup>1</sup>, Bofan Wang<sup>1</sup>, Xiang Zhou<sup>1</sup>, Ao Chen<sup>1</sup>

<sup>1</sup>Institute of Biology and Medicine, College of Life Science and Health, Wuhan University of Science and Technology, Wuhan 430081, Hubei Province, People's Republic of China

\*Co-first author
